# Supplementary material for: Gender Difference in the Association Between Executive Function and Autistic Traits in Typically Developing Children
Source: Springer Nature journal article supplement (doi:10.1007/s10803-018-3813-5), 2018-11-15
Supplement: MOESM1 [file 16273882]

Table S1 Differences of SRS and WCST scores between boys and girls (mean±SD)

|  | | All children | | | |  | Children with HAT | | | | |  | | Children with LAT | | | |  | | Difference between HAT and LAT boys | | | Difference between HAT and LAT Girls | |
| --- | --- | --- | --- | --- | --- | --- | --- | --- | --- | --- | --- | --- | --- | --- | --- | --- | --- | --- | --- | --- | --- | --- | --- | --- |
| Measures | | Boys | Girls | *P* a | *P* c |  | Boys | Girls | *P* a | *P* c |  | | Boys | | Girls | *P* a | *P* c |  | *P* a | | *P* c | *P* a | | *P* c |
| Age b | | 7.61±0.96 | 7.65±0.95 | 0.655 |  |  | 7.56±0.96 | 7.89±0.93 | 0.098 |  |  | | 7.63±0.96 | | 7.59±0.95 | 0.734 |  |  | 0.608 | | 0.608 |  | |  |
| FSIQ b | | 107.40±13.27 | 109.93±13.01 | 0.055 |  |  | 101.93±13.5 | 103.23±12.54 | 0.635 |  |  | | 109.67±12.53 | | 111.62±12.61 | 0.176 |  |  | **<0.001** | | **<0.001** |  | |  |
| SRS | TS | 48.95±16.03 | 45.80±14.82 | 0.136 | 0.163 |  | 68.87±10.28 | 67.14±10.57 | 0.370 | 0.555 |  | | 40.70±9.32 | | 40.42±10.16 | 0.942 | 0.942 |  | **<0.0001** | | **<0.001** | **<0.0001** | | **<0.001** |
|  | SA | **8.43±2.33** | **7.75±2.40** | **0.008** | **0.024** |  | 9.89±2.26 | 9.20±2.27 | 0.172 | 0.516 |  | | 7.83±2.09 | | 7.39±2.29 | 0.099 | 0.149 |  | **<0.0001** | | **<0.001** | **0.0003** | | **<0.001** |
|  | SCog | 10.71±3.74 | 11.09±3.66 | 0.078 | 0.156 |  | 14.36±2.39 | 14.94±2.51 | 0.300 | 0.555 |  | | **9.20±3.11** | | **10.12±3.25** | **0.004** | **0.012** |  | **<0.0001** | | **<0.001** | **<0.0001** | | **<0.001** |
|  | SCom | 14.49±6.66 | 13.16±6.15 | 0.116 | 0.163 |  | 22.14±4.83 | 21.80±5.61 | 0.740 | 0.888 |  | | 11.31±4.32 | | 10.98±3.99 | 0.663 | 0.796 |  | **<0.0001** | | **<0.001** | **<0.0001** | | **<0.001** |
|  | SM | 8.70±3.65 | 8.71±3.35 | 0.575 | 0.575 |  | 12.23±3.46 | 12.43±3.4 | 0.932 | 0.932 |  | | **7.24±2.58** | | **7.77±2.61** | **0.040** | 0.080 |  | **<0.0001** | | **<0.001** | **<0.0001** | | **<0.001** |
|  | AM | **6.63±3.71** | **5.09±3.18** | **<0.0001** | **<0.001** |  | 10.26±3.74 | 8.77±3.65 | 0.054 | 0.324 |  | | **5.13±2.44** | | **4.17±2.26** | **0.001** | **0.006** |  | **<0.0001** | | **<0.001** | **<0.0001** | | **<0.001** |
| WCST | CC | 4.30±1.70 | 4.78±1.50 |  |  |  | 4.13±1.73 | 4.54±1.77 |  |  |  | | 4.37±1.68 | | 4.84±1.43 |  |  |  |  | |  |  | |  |
|  | FMS | 2.15±1.52 | 1.82±1.54 |  |  |  | 2.07±1.64 | 1.54±1.46 |  |  |  | | 2.19±1.47 | | 1.88±1.56 |  |  |  |  | |  |  | |  |
|  | NPE | 41.23±21.55 | 37.51±22.72 |  |  |  | 41.34±21.55 | 41.06±28.06 |  |  |  | | 41.19±21.61 | | 36.61±21.19 |  |  |  |  | |  |  | |  |
|  | SE | 33.44±20.99 | 40.45±22.83 |  |  |  | 33.10±22.99 | 39.57±24.56 |  |  |  | | 33.58±20.17 | | 40.67±22.46 |  |  |  |  | |  |  | |  |

a adjusted for age and IQ.

b comparison using Two-sample t-test.

c adjusted for age and IQ and after false-discovery-rate correction for SRS scores.

Abbreviations: SRS=Social Responsiveness Scale; WCST=Wisconsin Card Sorting Test; TS=total score; SA= social awareness; SCog=social cognition; SCom=social communication; SM=social motivation; AM=autistic mannerism; CC=categories completed; FMS=failure to maintain set; NPE=non-perseverative errors; SE, shifting efficiency.

Table S2 Pearson correlation coefficients of SRS and EF from different SRS levels of boys and girls

|  | TS | | | |  | SA | | |  | SCog | | |  | SCom | | |  | SM | | |  | AM | | |
| --- | --- | --- | --- | --- | --- | --- | --- | --- | --- | --- | --- | --- | --- | --- | --- | --- | --- | --- | --- | --- | --- | --- | --- | --- |
| *r* | | *P* | *P* a |  | *r* | *P* | *P* a |  | *r* | *P* | *P* a |  | *r* | *P* | *P* a |  | *r* | *P* | *P* a |  | *r* | *P* | *P* a |
| HAT boys (n=70) | | | |  |  |  |  |  |  |  |  |  |  |  |  |  |  |  |  |  |  |  |  |  |
| CC | **-0.290** | | **0.015** | 0.060 |  | **-0.309** | **0.009** | 0.036 |  | -0.166 | 0.170 | 0.498 |  | **-0.270** | 0.024 | 0.096 |  | -0.107 | 0.378 | 0.693 |  | -0.057 | 0.641 | 0.677 |
| FMS | -0.022 | | 0.858 | 0.858 |  | -0.017 | 0.887 | 0.887 |  | -0.003 | 0.981 | 0.981 |  | -0.027 | 0.826 | 0.826 |  | 0.048 | 0.693 | 0.693 |  | -0.057 | 0.638 | 0.677 |
| NPE | 0.131 | | 0.280 | 0.560 |  | 0.163 | 0.178 | 0.237 |  | 0.14 | 0.249 | 0.498 |  | 0.151 | 0.212 | 0.424 |  | -0.079 | 0.515 | 0.693 |  | 0.051 | 0.677 | 0.677 |
| SE | -0.091 | | 0.452 | 0.603 |  | -0.179 | 0.137 | 0.237 |  | -0.043 | 0.721 | 0.961 |  | -0.097 | 0.422 | 0.563 |  | -0.052 | 0.671 | 0.693 |  | 0.059 | 0.629 | 0.677 |
| HAT girls (n=35) | |  | |  |  |  |  |  |  |  |  |  |  |  |  |  |  |  |  |  |  |  |  |  |
| CC | -0.237 | | 0.171 | 0.228 |  | -0.072 | 0.683 | 0.683 |  | **-0.456** | **0.006** | 0.012 |  | -0.255 | 0.139 | 0.184 |  | 0.161 | 0.357 | 0.671 |  | -0.085 | 0.628 | 0.837 |
| FMS | 0.334 | | 0.050 | 0.100 |  | 0.232 | 0.180 | 0.436 |  | 0.265 | 0.123 | 0.123 |  | **0.354** | **0.037** | 0.092 |  | -0.048 | 0.783 | 0.783 |  | 0.14 | 0.423 | 0.837 |
| NPE | 0.185 | | 0.288 | 0.288 |  | 0.084 | 0.632 | 0.683 |  | **0.423** | **0.011** | 0.015 |  | 0.23 | 0.184 | 0.184 |  | -0.171 | 0.327 | 0.671 |  | -0.003 | 0.986 | 0.986 |
| SE | **-0.373** | | **0.028** | 0.100 |  | -0.213 | 0.218 | 0.436 |  | **-0.539** | **0.001** | 0.004 |  | **-0.339** | **0.046** | 0.092 |  | 0.117 | 0.503 | 0.671 |  | -0.163 | 0.350 | 0.837 |
| LAT boys (n=169) | |  | |  |  |  |  |  |  |  |  |  |  |  |  |  |  |  |  |  |  |  |  |  |
| CC | 0.011 | | 0.890 | 0.890 |  | 0.013 | 0.867 | 0.867 |  | -0.046 | 0.555 | 0.740 |  | 0.05 | 0.516 | 0.841 |  | -0.001 | 0.988 | 0.988 |  | 0.01 | 0.999 | 0.999 |
| FMS | -0.012 | | 0.878 | 0.890 |  | 0.125 | 0.105 | 0.420 |  | -0.003 | 0.970 | 0.970 |  | 0.063 | 0.417 | 0.841 |  | -0.141 | 0.068 | 0.272 |  | -0.112 | 0.149 | 0.596 |
| NPE | 0.045 | | 0.560 | 0.890 |  | -0.049 | 0.525 | 0.700 |  | 0.072 | 0.351 | 0.702 |  | -0.004 | 0.956 | 0.956 |  | 0.078 | 0.314 | 0.628 |  | 0.048 | 0.538 | 0.944 |
| SE | -0.075 | | 0.330 | 0.890 |  | -0.051 | 0.510 | 0.700 |  | -0.111 | 0.151 | 0.604 |  | -0.037 | 0.631 | 0.841 |  | -0.007 | 0.926 | 0.988 |  | -0.029 | 0.708 | 0.944 |
| LAT girls (n=139) | | | |  |  | 0.743 |  |  |  |  |  |  |  |  |  |  |  |  |  |  |  |  |  |  |
| CC | 0.028 | | 0.743 | 0.743 |  | 0.052 | 0.543 | 0.846 |  | 0.053 | 0.539 | 0.855 |  | 0.018 | 0.830 | 0.830 |  | -0.06 | 0.481 | 0.641 |  | 0.035 | 0.683 | 0.918 |
| FMS | 0.056 | | 0.512 | 0.743 |  | 0.017 | 0.846 | 0.846 |  | 0.016 | 0.855 | 0.855 |  | 0.079 | 0.357 | 0.714 |  | 0.02 | 0.814 | 0.814 |  | 0.051 | 0.555 | 0.918 |
| NPE | 0.049 | | 0.563 | 0.743 |  | -0.029 | 0.738 | 0.846 |  | 0.036 | 0.673 | 0.855 |  | 0.03 | 0.727 | 0.830 |  | 0.142 | 0.094 | 0.188 |  | -0.018 | 0.834 | 0.918 |
| SE | -0.092 | | 0.283 | 0.743 |  | 0.039 | 0.648 | 0.846 |  | -0.08 | 0.352 | 0.855 |  | -0.092 | 0.282 | 0.714 |  | -0.159 | 0.061 | 0.188 |  | 0.009 | 0.918 | 0.918 |

a after false-discovery-rate correction within each SRS score.

Table S3 Multiple regression analysis of executive functions predicting autistic traits in HAT boys and girls a

| EF | SRS | | | | | | | | | | | | | | | | | | | | | | | |
| --- | --- | --- | --- | --- | --- | --- | --- | --- | --- | --- | --- | --- | --- | --- | --- | --- | --- | --- | --- | --- | --- | --- | --- | --- |
| TS | | | |  | SA | | |  | SCog | | |  | SCom | | |  | SM | | |  | AM | | |
| *β* | | *P*a | *P* b |  | *β* | *P*a | *P* b |  | *β* | *P*a | *P* b |  | *β* | *P*a | *P* b |  | *β* | *P*a | *P* b |  | *β* | *P*a | *P* b |
| HAT boys(n=70) | | | | |  |  |  |  |  |  |  |  |  |  |  |  |  |  |  |  |  |  |  |  |
| CC | **-1.73** | | **0.027** | 0.068 |  | **-0.45** | **0.0097** | **0.039** |  | -0.24 | 0.1673 | 0.350 |  | **-0.74** | **0.047** | 0.188 |  | -0.21 | 0.4518 | 0.753 |  | -0.10 | 0.744 | 0.764 |
| FMS | -0.21 | | 0.783 | 0.783 |  | -0.04 | 0.837 | 0.837 |  | -0.07 | 0.693 | 0.866 |  | -0.08 | 0.82 | 0.820 |  | 0.10 | 0.7 | 0.775 |  | -0.13 | 0.653 | 0.764 |
| NPE | 0.05 | | 0.400 | 0.667 |  | 0.02 | 0.21 | 0.263 |  | 0.02 | 0.21 | 0.350 |  | 0.03 | 0.331 | 0.552 |  | -0.02 | 0.403 | 0.753 |  | 0.01 | 0.764 | 0.764 |
| SE | -0.02 | | 0.671 | 0.783 |  | -0.02 | 0.18 | 0.263 |  | <0.01 | 0.878 | 0.878 |  | -0.01 | 0.629 | 0.786 |  | -0.01 | 0.775 | 0.775 |  | 0.01 | 0.529 | 0.764 |
| PE | -1.32 | | **0.009** | **0.045** |  | -0.23 | 0.0487 | 0.122 |  | -0.22 | 0.0595 | 0.298 |  | -0.39 | 0.1123 | 0.281 |  | -0.23 | 0.188 | 0.753 |  | -0.26 | 0.178 | 0.764 |
| HAT girls (n=35) | |  | |  |  |  |  |  |  |  |  |  |  |  |  |  |  |  |  |  |  |  |  |  |
| CC | **-3.25** | | **0.0059** | **0.011** |  | -0.12 | 0.665 | 0.665 |  | **-0.81** | **0.0048** | **0.012** |  | **-1.70** | **0.006** | **0.010** |  | -0.05 | 0.899 | 0.911 |  | -0.58 | 0.184 | 0.460 |
| FMS | 2.01 | | 0.168 | 0.168 |  | 0.31 | 0.323 | 0.633 |  | **0.74** | **0.0355** | **0.044** |  | 1.03 | 0.18 | 0.180 |  | -0.28 | 0.533 | 0.911 |  | 0.22 | 0.673 | 0.673 |
| NPE | **0.22** | | **0.0068** | **0.011** |  | 0.01 | 0.506 | 0.633 |  | **0.05** | **0.0073** | **0.012** |  | **0.12** | **0.003** | **0.007** |  | <0.01 | 0.911 | 0.911 |  | 0.03 | 0.388 | 0.597 |
| SE | **-0.28** | | **0.0004** | **0.002** |  | -0.02 | 0.217 | 0.633 |  | **-0.07** | **0.0007** | **0.004** |  | **-0.13** | **0.003** | **0.007** |  | -0.01 | 0.684 | 0.911 |  | -0.05 | 0.088 | 0.440 |
| PE | **-1.77** | | **0.0402** | **0.050** |  | -0.15 | 0.4295 | 0.6325 |  | -0.25 | 0.2526 | 0.2526 |  | **-1.01** | **0.024** | **0.030** |  | -0.14 | 0.6073 | 0.911 |  | -0.22 | 0.4777 | 0.597 |

Notes: a adjusted for age and IQ b adjusted for age and IQ and after false-discovery-rate correction within each SRS score.

Abbreviations: EF=executive function; SRS=Social Responsiveness Scale; TS=total score; SA=social awareness; SCog=social cognition; SCom=social communication; SM=social motivation; AM=autistic mannerism; CC=categories completed; FMS=failure to maintain set; NPE=non-perseverative errors; SE, shifting efficiency; PE, perseverative errors; HAT, high-autistic-trait.
